# Supplementary material for: Natural, Persistent Oscillations in a Spatial Multi-Strain Disease System with Application to Dengue
Source: PubMed Central journal article supplement (PMC3812071; doi:10.1371/journal.pcbi.1003308), 2013-10-24

**A****Monthly cases DF / DHF, Mexico**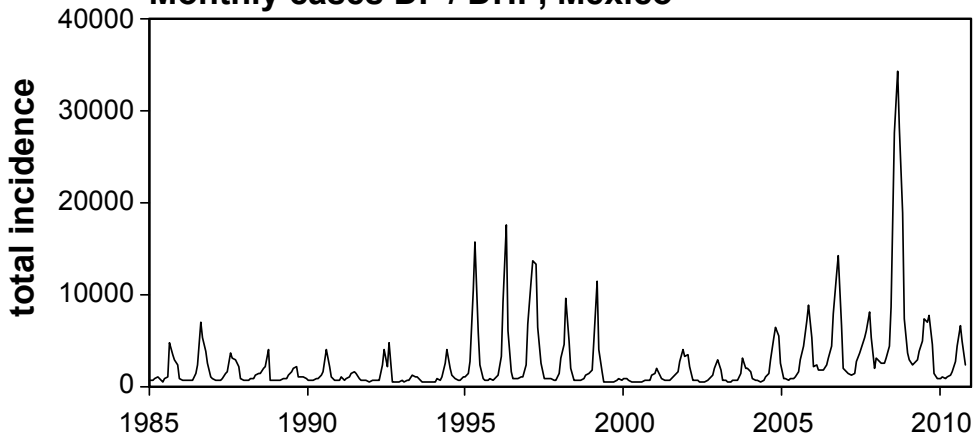**Annual cases DHF, Thailand**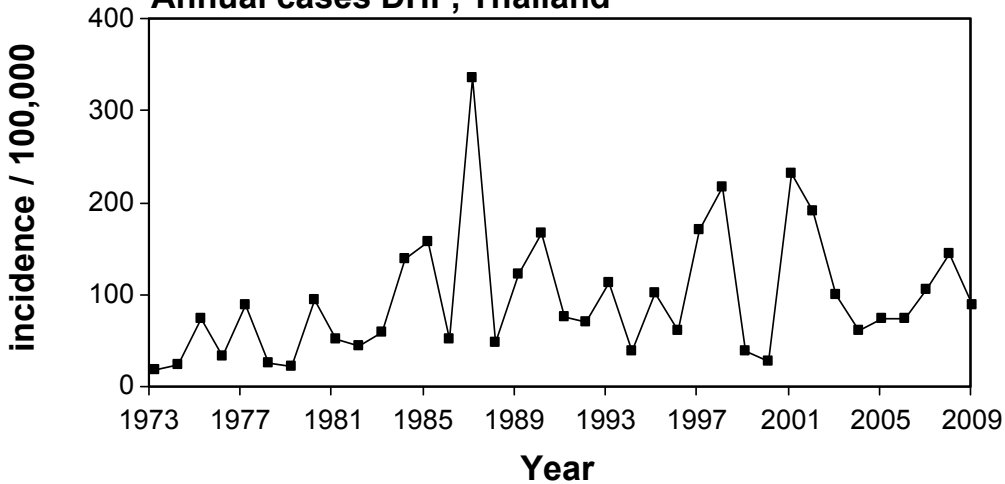**B****Relative serotype prevalence, Thailand**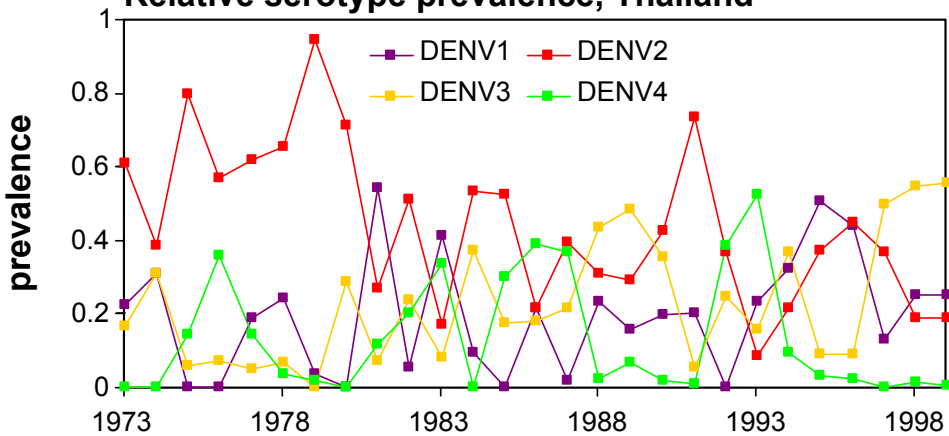**Relative serotype prevalence, Ho Chi Minh City**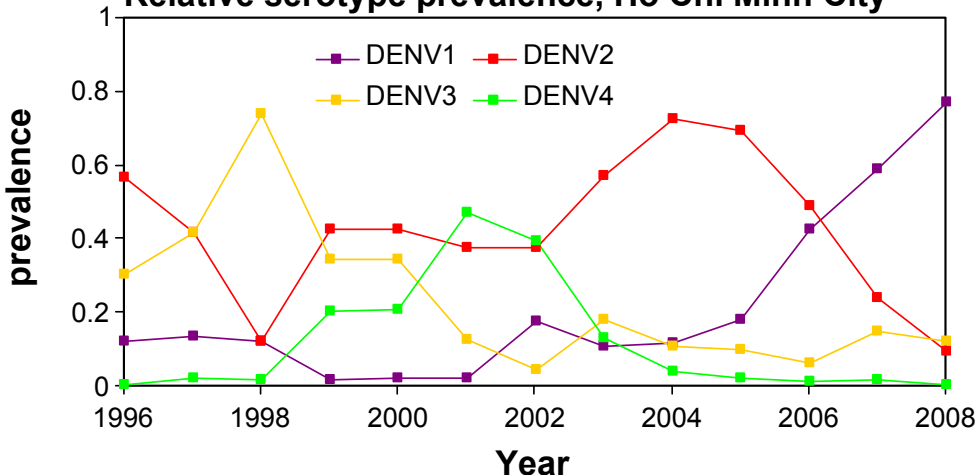

Supplement: pcbi.1003308.s002.pdf [file pcbi.1003308.s002.pdf]
