# Supplementary material for: Natural, Persistent Oscillations in a Spatial Multi-Strain Disease System with Application to Dengue
Source: PubMed Central journal article supplement (PMC3812071; doi:10.1371/journal.pcbi.1003308), 2013-10-24

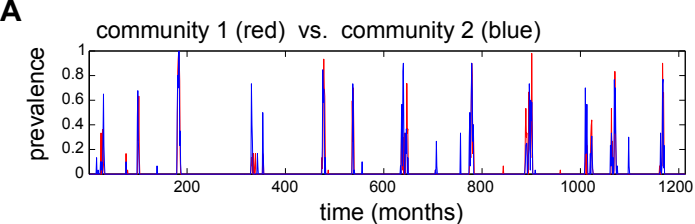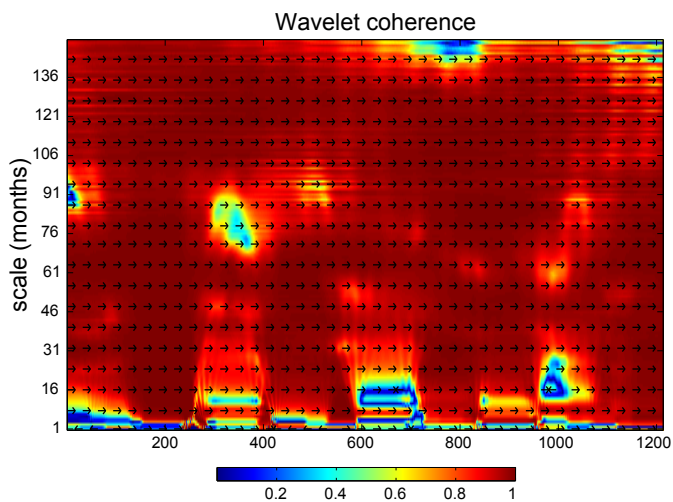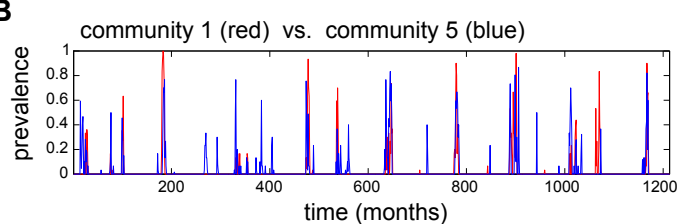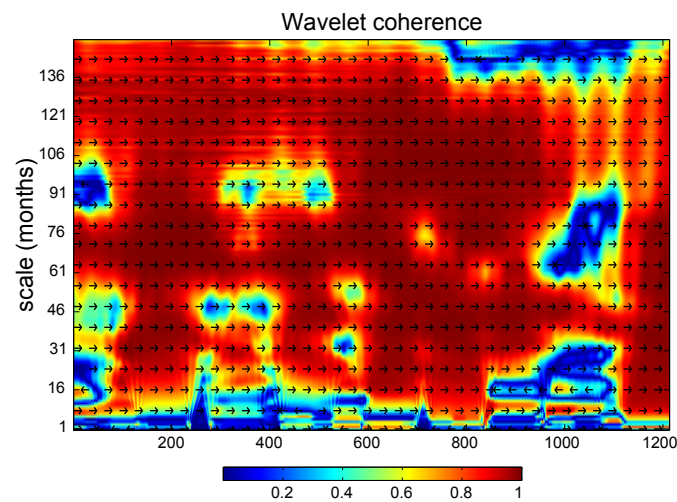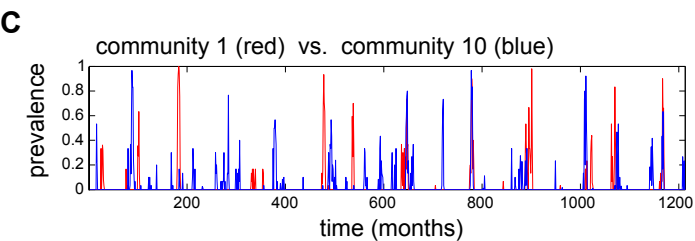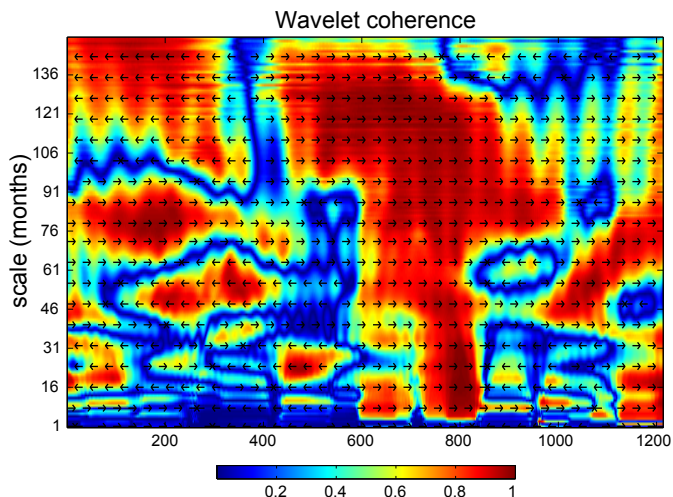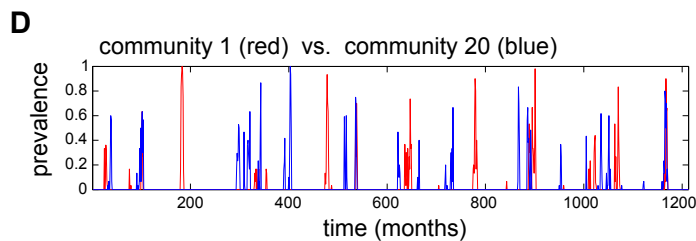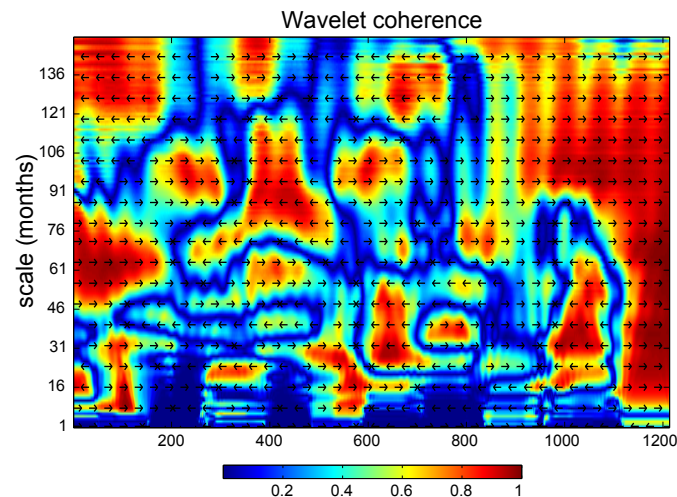

Supplement: pcbi.1003308.s003.pdf [file pcbi.1003308.s003.pdf]
