# Supplementary material for: Natural, Persistent Oscillations in a Spatial Multi-Strain Disease System with Application to Dengue
Source: PubMed Central journal article supplement (PMC3812071; doi:10.1371/journal.pcbi.1003308), 2013-10-24
Supplement: pcbi.1003308.s005.pdf [file pcbi.1003308.s005.pdf]

Table S1:  $R_0$  estimates for dengue (reproduced from [13]).

| Study | N | Cross-protection | Enhancement    | Median $R_0$       | Method                   |
|-------|---|------------------|----------------|--------------------|--------------------------|
| [1]   | 1 | No               | No             | 1.3 (0, 2.4)       | final epi. size          |
| [2]   | 1 | No               | No             | 1.9                | hypothetical             |
| [3]   | 1 | No               | No             | 2.0 (1.6, 2.5)     | epi. growth curve        |
| [4]   | 4 | Susceptibility   | Susceptibility | 4.8 (1.4, 8.5)     | age stratified seroprev. |
| [5]   | 1 | No               | No             | 6.3 (3.6,12.9)     | epi. growth curve        |
| [6]   | 1 | No               | No             | 4.8 (2.7, 11.6)    | epi. growth curve        |
| [7]   | 1 | No               | No             | 3.0 (2.0, 103)     | epi. growth curve        |
| [8]   | 1 | No               | No             | 2.0 (0.5, 3.3)     | epi. growth curve        |
| [9]   | 1 | No               | No             | 3.69 (2.26, 11.39) | epi. growth curve        |
| [10]  | 4 | Susceptibility   | Both*          | § (4, 12)          | age dist. of cases       |
| [11]  | 1 | No               | No             | 5.17 (1.56, 22.89) | fitting SIR model        |
| [12]  | 4 | Susceptibility   | Susceptibility | (5.2, 6.7)         | age dist. of cases       |

N - number of serotypes

\* - susceptibility and infectiousness

§ - only a range was explored.

## References:

- [1] Koopman, J. S., Prevots, D. R., Vaca Marin, M. a., Gomez Dantes, H., Zarate Aquino, M. L., Longini, I. M., and Sepulveda Amor, J. (1991). Determinants and predictors of dengue infection in Mexico. *American journal of epidemiology*, 133(11):1168–78.
- [2] Newton, E. a. and Reiter, P. (1992). A model of the transmission of dengue fever with an evaluation of the impact of ultra-low volume (ULV) insecticide applications on dengue epidemics. *The American journal of tropical medicine and hygiene*, 47(6):709–20.
- [3] Marques, C. A., Forattini, O. P., and Massad, E. (1994). The basic reproduction number for dengue fever in Sao Paulo state, Brazil: 1990-1991 epidemic. *Transactions of the Royal Society of Tropical Medicine and Hygiene*, 88(1):58–9.
- [4] Ferguson, N. M., Donnelly, C. A., and Anderson, R. M. (1999b). Transmission dynamics and epidemiology of dengue: insights from age-stratified sero-prevalence surveys. *Philosophical transactions of the Royal Society of London. Series B, Biological sciences*, 354(1384):757–68.
- [5] Massad, E., Coutinho, F. A., Burattini, M. N., and Lopez, L. F. (2001). The risk of yellow fever in a dengue-infested area. *Transactions of the Royal Society of Tropical Medicine and Hygiene*, 95(4):370–4.
- [6] Massad, E., Burattini, M. N., Coutinho, F. A. B., and Lopez, L. F. (2003). Dengue and the risk of urban yellow fever reintroduction in Sao Paulo State, Brazil. *Revista de saude publica*, 37(4):477–84.
- [7] Favier, C., Degallier, N., Rosa-Freitas, M. G., Boulanger, J. P., Costa Lima, J. R., Luitgards-Moura, J. F., Menkes, C. E., Mondet, B., Oliveira, C., Weimann, E. T. S., and Tsouris, P. (2006). Early determination of the reproductive number for vector-borne diseases: the case of dengue in Brazil. *Tropical medicine & international health : TM & IH*, 11(3):332–40.
- [8] Chowell, G., Diaz-Duenas, P., Miller, J. C., Alcazar-Velazco, A., Hyman, J. M., Fenimore, P. W., and Castillo-Chavez, C. (2007). Estimation of the reproduction number of dengue fever

from spatial epidemic data. *Mathematical biosciences*, 208(2):571–89.

[9] Coelho, G. E., Burattini, M. N., Teixeira, M. D. G., Coutinho, F. A. B., and Massad, E. (2008). Dynamics of the 2006/2007 dengue outbreak in Brazil. *Memorias do Instituto Oswaldo Cruz*, 103(6):535–9.

[10] Nagao, Y. and Koelle, K. (2008). Decreases in dengue transmission may act to increase the incidence of dengue hemorrhagic fever. *Proceedings of the National Academy of Sciences of the United States of America*, 105(6):2238–43.

[11] Degallier, N., Favier, C., Boulanger, J.-P., and Menkes, C. (2009). Imported and autochthonous cases in the dynamics of dengue epidemics in Brazil. *Revista de saude publica*, 43(1):1–7.

[12] Cummings, D. a. T., Iamsrithaworn, S., Lessler, J. T., McDermott, A., Prasanthong, R., Nisalak, A., Jarman, R. G., Burke, D. S., and Gibbons, R. V. (2009). The impact of the demographic transition on dengue in Thailand: insights from a statistical analysis and mathematical modeling. *PLoS Medicine*, 6(9):e1000139.

[13] Johansson, M. a., Hombach, J., and Cummings, D. a. T. (2011). Models of the impact of dengue vaccines: A review of current research and potential approaches. *Vaccine*, pages 1–9.
